# Supplementary material
Source: PubMed Central journal article supplement (PMC9949565)
Supplement: djac158_supplementary_data.pdf [file djac158_supplementary_data.pdf]

**SUPPLEMENTARY MATERIALS**

**Supplementary Table 1. Estimated numbers of individuals living with metastatic cancer on January 1, 2018, by cancer type and years since metastatic diagnosis**

| Cancer type       | Total N | Years since diagnosis |      |        |      |        |      |        |      |
|-------------------|---------|-----------------------|------|--------|------|--------|------|--------|------|
|                   |         | 0 - <2                |      | 2-<5   |      | 5-<10  |      | 10+    |      |
|                   |         | n                     | %    | n      | %    | n      | %    | n      | %    |
| Lung and Bronchus | 174,090 | 97,205                | 55.8 | 39,987 | 23.0 | 21,180 | 12.2 | 15,718 | 9.0  |
| Breast (female)   | 140,230 | 54,233                | 38.7 | 37,225 | 26.5 | 21,889 | 15.6 | 26,883 | 19.2 |
| Colon and Rectum  | 133,234 | 56,026                | 42.1 | 29,767 | 22.3 | 20,130 | 15.1 | 27,311 | 20.5 |
| Prostate (male)   | 120,368 | 53,418                | 44.4 | 34,208 | 28.4 | 19,905 | 16.5 | 12,837 | 10.7 |
| Melanoma          | 39,716  | 10,901                | 27.4 | 9,812  | 24.7 | 7,683  | 19.3 | 11,320 | 28.5 |
| Bladder           | 15,767  | 9,089                 | 57.6 | 3,058  | 19.4 | 1,637  | 10.4 | 1,983  | 12.6 |

**Supplementary Table 2. Number of people and one-year relative survival in percentage (95% confidence interval) for people diagnosed with de novo metastatic cancer in the SEER-18 areas by grouped age (0-85+) and year at diagnosis.<sup>a</sup>**

| Cancer type       | Age, y | De novo Relative Survival (2000-2005) |                                 | De novo Relative Survival (2006-2011) |                                 | De novo Relative Survival (2012-2017) |                                 |
|-------------------|--------|---------------------------------------|---------------------------------|---------------------------------------|---------------------------------|---------------------------------------|---------------------------------|
|                   |        | N                                     | 1-yr Relative Survival (95% CI) | N                                     | 1-yr Relative Survival (95% CI) | N                                     | 1-yr Relative Survival (95% CI) |
| Bladder           | 0-49   | 209                                   | 40% [33%, 46%]                  | 200                                   | 40% [33%, 47%]                  | 210                                   | 44% [37%, 51%]                  |
|                   | 50-64  | 693                                   | 33% [29%, 36%]                  | 865                                   | 37% [34%, 41%]                  | 1,181                                 | 33% [30%, 35%]                  |
|                   | 65-74  | 712                                   | 30% [26%, 33%]                  | 841                                   | 29% [26%, 32%]                  | 1,175                                 | 32% [29%, 35%]                  |
|                   | 75-84  | 773                                   | 20% [18%, 24%]                  | 864                                   | 23% [20%, 26%]                  | 984                                   | 24% [21%, 26%]                  |
|                   | 85+    | 282                                   | 12% [8%, 17%]                   | 351                                   | 16% [12%, 20%]                  | 454                                   | 12% [9%, 16%]                   |
|                   | 0+     | 2,669                                 | 27% [25%, 29%]                  | 3,121                                 | 29% [27%, 31%]                  | 4,004                                 | 29% [27%, 30%]                  |
| Breast (female)   | 0-49   | 2,655                                 | 69% [67%, 71%]                  | 3,450                                 | 77% [76%, 79%]                  | 3,731                                 | 79% [77%, 80%]                  |
|                   | 50-64  | 4,532                                 | 61% [60%, 63%]                  | 6,063                                 | 66% [65%, 67%]                  | 7,010                                 | 69% [68%, 71%]                  |
|                   | 65-74  | 2,578                                 | 52% [50%, 54%]                  | 3,112                                 | 59% [57%, 61%]                  | 4,071                                 | 60% [59%, 62%]                  |
|                   | 75-84  | 2,278                                 | 42% [40%, 44%]                  | 2,301                                 | 46% [43%, 48%]                  | 2,605                                 | 49% [47%, 51%]                  |
|                   | 85+    | 872                                   | 34% [30%, 37%]                  | 1,057                                 | 36% [33%, 39%]                  | 1,213                                 | 35% [32%, 39%]                  |
|                   | 0+     | 12,915                                | 56% [55%, 57%]                  | 15,983                                | 62% [61%, 63%]                  | 18,630                                | 64% [63%, 65%]                  |
| Colon and Rectum  | 0-49   | 4,725                                 | 65% [64%, 66%]                  | 5,606                                 | 73% [71%, 74%]                  | 6,366                                 | 75% [74%, 76%]                  |
|                   | 50-64  | 11,074                                | 60% [59%, 61%]                  | 12,984                                | 64% [63%, 65%]                  | 14,729                                | 64% [64%, 65%]                  |
|                   | 65-74  | 8,863                                 | 46% [45%, 47%]                  | 8,253                                 | 54% [52%, 55%]                  | 9,268                                 | 55% [54%, 56%]                  |
|                   | 75-84  | 8,347                                 | 33% [32%, 34%]                  | 6,959                                 | 38% [37%, 39%]                  | 6,207                                 | 37% [35%, 38%]                  |
|                   | 85+    | 3,247                                 | 20% [19%, 22%]                  | 3,397                                 | 21% [20%, 23%]                  | 3,225                                 | 22% [20%, 24%]                  |
|                   | 0+     | 36,256                                | 48% [47%, 48%]                  | 37,199                                | 55% [54%, 55%]                  | 39,795                                | 56% [56%, 57%]                  |
| Lung and Bronchus | 0-49   | 9,207                                 | 32% [31%, 33%]                  | 7,794                                 | 38% [37%, 40%]                  | 5,283                                 | 46% [45%, 48%]                  |
|                   | 50-64  | 39,804                                | 28% [27%, 28%]                  | 42,645                                | 32% [31%, 32%]                  | 41,090                                | 35% [34%, 35%]                  |
|                   | 65-74  | 40,058                                | 23% [22%, 23%]                  | 39,912                                | 27% [26%, 27%]                  | 41,514                                | 30% [30%, 31%]                  |
|                   | 75-84  | 31,539                                | 17% [17%, 18%]                  | 31,444                                | 21% [20%, 21%]                  | 28,424                                | 24% [23%, 24%]                  |
|                   | 85+    | 7,570                                 | 12% [11%, 13%]                  | 9,543                                 | 14% [14%, 15%]                  | 9,640                                 | 16% [15%, 17%]                  |
|                   | 0+     | 128,178                               | 23% [23%, 23%]                  | 131,338                               | 27% [27%, 27%]                  | 125,951                               | 30% [30%, 30%]                  |
| Melanoma          | 0-49   | 611                                   | 42% [38%, 46%]                  | 636                                   | 47% [43%, 51%]                  | 716                                   | 63% [59%, 67%]                  |
|                   | 50-64  | 829                                   | 40% [36%, 43%]                  | 1,167                                 | 43% [40%, 46%]                  | 1,481                                 | 55% [52%, 58%]                  |
|                   | 65-74  | 532                                   | 41% [37%, 46%]                  | 647                                   | 41% [37%, 45%]                  | 961                                   | 51% [48%, 54%]                  |
|                   | 75-84  | 448                                   | 36% [31%, 40%]                  | 505                                   | 34% [30%, 38%]                  | 658                                   | 45% [41%, 49%]                  |
|                   | 85+    | 161                                   | 30% [22%, 38%]                  | 214                                   | 36% [29%, 43%]                  | 296                                   | 43% [37%, 49%]                  |
|                   | 0+     | 2,581                                 | 39% [37%, 41%]                  | 3,169                                 | 42% [40%, 43%]                  | 4,112                                 | 53% [52%, 55%]                  |
| Prostate (male)   | 0-49   | 320                                   | 83% [78%, 87%]                  | 352                                   | 83% [79%, 87%]                  | 354                                   | 90% [86%, 93%]                  |
|                   | 50-64  | 2,986                                 | 82% [80%, 83%]                  | 3,896                                 | 84% [83%, 85%]                  | 5,404                                 | 86% [85%, 87%]                  |
|                   | 65-74  | 3,689                                 | 79% [77%, 80%]                  | 3,826                                 | 79% [78%, 80%]                  | 6,136                                 | 83% [82%, 84%]                  |
|                   | 75-84  | 4,073                                 | 70% [68%, 71%]                  | 3,741                                 | 71% [70%, 73%]                  | 5,002                                 | 75% [74%, 76%]                  |
|                   | 85+    | 1,736                                 | 58% [55%, 60%]                  | 2,000                                 | 57% [54%, 60%]                  | 2,962                                 | 65% [62%, 67%]                  |
|                   | 0+     | 12,804                                | 74% [73%, 75%]                  | 13,815                                | 76% [75%, 76%]                  | 19,858                                | 79% [79%, 80%]                  |

<sup>a</sup>Relative survival is presented for both sexes combined unless otherwise stated.

**Supplementary Table 3. Number of people and five-year relative survival in percentage (95% confidence interval) for people diagnosed with de novo metastatic cancer in the SEER-18 areas by grouped age (0-85+) and year at diagnosis.<sup>a</sup>**

| Cancer type       | Age, y | De novo Relative Survival (2000-2005) |                                 | De novo Relative Survival (2006-2011) |                                 | De novo Relative Survival (2012-2017) |                                 |
|-------------------|--------|---------------------------------------|---------------------------------|---------------------------------------|---------------------------------|---------------------------------------|---------------------------------|
|                   |        | N                                     | 5-yr Relative Survival (95% CI) | N                                     | 5-yr Relative Survival (95% CI) | N                                     | 5-yr Relative Survival (95% CI) |
| Bladder           | 0-49   | 209                                   | 12% [8%, 17%]                   | 200                                   | 8% [5%, 13%]                    | 210                                   | 12% [7%, 18%]                   |
|                   | 50-64  | 693                                   | 7% [5%, 9%]                     | 865                                   | 6% [5%, 8%]                     | 1,181                                 | 8% [6%, 10%]                    |
|                   | 65-74  | 712                                   | 5% [4%, 7%]                     | 841                                   | 5% [3%, 6%]                     | 1,175                                 | 8% [6%, 10%]                    |
|                   | 75-84  | 773                                   | 4% [3%, 6%]                     | 864                                   | 4% [3%, 6%]                     | 984                                   | 6% [4%, 9%]                     |
|                   | 85+    | 282                                   | 3% [1%, 7%]                     | 351                                   | 4% [2%, 8%]                     | 454                                   | 4% [2%, 8%]                     |
|                   | 0+     | 2,669                                 | 6% [5%, 7%]                     | 3,121                                 | 5% [4%, 6%]                     | 4,004                                 | 7% [6%, 8%]                     |
| Breast (female)   | 0-49   | 2,655                                 | 22% [20%, 23%]                  | 3,450                                 | 28% [27%, 30%]                  | 3,731                                 | 32% [29%, 34%]                  |
|                   | 50-64  | 4,532                                 | 18% [16%, 19%]                  | 6,063                                 | 20% [18%, 20%]                  | 7,010                                 | 22% [21%, 23%]                  |
|                   | 65-74  | 2,578                                 | 13% [12%, 15%]                  | 3,112                                 | 17% [16%, 19%]                  | 4,071                                 | 20% [18%, 22%]                  |
|                   | 75-84  | 2,278                                 | 10% [8%, 11%]                   | 2,301                                 | 13% [11%, 14%]                  | 2,605                                 | 14% [12%, 16%]                  |
|                   | 85+    | 872                                   | 9% [7%, 12%]                    | 1,057                                 | 9% [7%, 12%]                    | 1,213                                 | 7% [5%, 10%]                    |
|                   | 0+     | 12,915                                | 16% [15%, 16%]                  | 15,983                                | 19% [19%, 20%]                  | 18,630                                | 21% [21%, 22%]                  |
| Colon and Rectum  | 0-49   | 4,725                                 | 16% [15%, 17%]                  | 5,606                                 | 20% [19%, 21%]                  | 6,366                                 | 22% [20%, 23%]                  |
|                   | 50-64  | 11,074                                | 13% [13%, 14%]                  | 12,984                                | 17% [16%, 17%]                  | 14,729                                | 18% [17%, 18%]                  |
|                   | 65-74  | 8,863                                 | 11% [10%, 11%]                  | 8,253                                 | 13% [13%, 14%]                  | 9,268                                 | 15% [14%, 16%]                  |
|                   | 75-84  | 8,347                                 | 7% [6%, 8%]                     | 6,959                                 | 8% [7%, 9%]                     | 6,207                                 | 8% [7%, 9%]                     |
|                   | 85+    | 3,247                                 | 6% [4%, 7%]                     | 3,397                                 | 4% [4%, 6%]                     | 3,225                                 | 6% [4%, 7%]                     |
|                   | 0+     | 36,256                                | 11% [11%, 11%]                  | 37,199                                | 14% [14%, 14%]                  | 39,795                                | 15% [15%, 16%]                  |
| Lung and Bronchus | 0-49   | 9,207                                 | 6% [5%, 6%]                     | 7,794                                 | 8% [7%, 9%]                     | 5,283                                 | 13% [12%, 14%]                  |
|                   | 50-64  | 39,804                                | 4% [4%, 5%]                     | 42,645                                | 6% [5%, 6%]                     | 41,090                                | 8% [8%, 9%]                     |
|                   | 65-74  | 40,058                                | 3% [3%, 3%]                     | 39,912                                | 4% [4%, 5%]                     | 41,514                                | 6% [6%, 7%]                     |
|                   | 75-84  | 31,539                                | 2% [2%, 2%]                     | 31,444                                | 3% [3%, 3%]                     | 28,424                                | 5% [4%, 5%]                     |
|                   | 85+    | 7,570                                 | 2% [1%, 2%]                     | 9,543                                 | 2% [2%, 3%]                     | 9,640                                 | 3% [2%, 4%]                     |
|                   | 0+     | 128,178                               | 3% [3%, 4%]                     | 131,338                               | 5% [4%, 5%]                     | 125,951                               | 7% [7%, 7%]                     |
| Melanoma          | 0-49   | 611                                   | 18% [15%, 21%]                  | 636                                   | 24% [20%, 27%]                  | 716                                   | 38% [34%, 42%]                  |
|                   | 50-64  | 829                                   | 17% [14%, 19%]                  | 1,167                                 | 19% [17%, 22%]                  | 1,481                                 | 33% [30%, 36%]                  |
|                   | 65-74  | 532                                   | 14% [11%, 17%]                  | 647                                   | 17% [14%, 20%]                  | 961                                   | 30% [27%, 34%]                  |
|                   | 75-84  | 448                                   | 13% [9%, 17%]                   | 505                                   | 14% [11%, 18%]                  | 658                                   | 22% [17%, 27%]                  |
|                   | 85+    | 161                                   | 8% [3%, 17%]                    | 214                                   | 10% [5%, 17%]                   | 296                                   | 19% [9%, 31%]                   |
|                   | 0+     | 2,581                                 | 15% [14%, 17%]                  | 3,169                                 | 18% [17%, 20%]                  | 4,112                                 | 31% [29%, 33%]                  |
| Prostate (male)   | 0-49   | 320                                   | 30% [25%, 35%]                  | 352                                   | 28% [23%, 33%]                  | 354                                   | 25% [19%, 32%]                  |
|                   | 50-64  | 2,986                                 | 32% [30%, 33%]                  | 3,896                                 | 34% [33%, 36%]                  | 5,404                                 | 35% [33%, 37%]                  |
|                   | 65-74  | 3,689                                 | 34% [32%, 36%]                  | 3,826                                 | 34% [33%, 36%]                  | 6,136                                 | 35% [33%, 37%]                  |
|                   | 75-84  | 4,073                                 | 26% [25%, 28%]                  | 3,741                                 | 28% [26%, 30%]                  | 5,002                                 | 29% [27%, 32%]                  |
|                   | 85+    | 1,736                                 | 20% [17%, 24%]                  | 2,000                                 | 18% [15%, 21%]                  | 2,962                                 | 16% [13%, 19%]                  |
|                   | 0+     | 12,804                                | 29% [28%, 30%]                  | 13,815                                | 30% [30%, 31%]                  | 19,858                                | 31% [30%, 32%]                  |

<sup>a</sup> Relative survival is presented for both sexes combined unless otherwise stated.
